# Supplementary material for: New Species and New Records of Otidea from China Based on Molecular and Morphological Data
Source: MDPI journal article supplement (doi:10.3390/jof8030272), 2022-03-08
Supplement: s1 [file s1]

Table S1. Information on sequences used in molecular phylogenetic analyses for *Otidea*.

Note: “—” shows no sequence in the GenBank database. GenBank accession numbers for sequences generated in this study are in boldface.

| <i>Species name</i>        | <i>Specimen voucher</i> | <i>Locality</i> | <i>ITS</i>      | <i>LSU</i>      | <i>efl-a</i> | <i>rpb2</i> |
|----------------------------|-------------------------|-----------------|-----------------|-----------------|--------------|-------------|
| <i>Monascella botryosa</i> | CBS 233.85              | Spain           | MH861870        | MH873558        | KC109256     | JX943831    |
| <i>O. adorniae</i>         | MCVE 30102              | Italy           | MK850486        | MK850502        | —            | —           |
| <i>O. adorniae</i>         | MCVE 30103              | Italy           | MK850485        | MK850501        | —            | —           |
| <i>O. adorniae</i>         | MCVE 30106              | Italy           | MK850484        | MK850500        | —            | —           |
| <i>O. adorniae</i>         | MCVE 30105              | Italy           | MK850483        | MK850499        | —            | —           |
| <i>O. adorniae</i>         | MCVE 30104              | Italy           | MK850482        | MK850498        | —            | —           |
| <i>O. alutacea</i>         | 420526MF0389            | China           | <b>OM700202</b> | MG712347        | —            | —           |
| <i>O. alutacea</i>         | 420526MF0402            | China           | —               | MH141322        | —            | —           |
| <i>O. alutacea</i>         | S-F257085               | Italy           | KM010069        | KM823192        | KM823260     | KM823386    |
| <i>O. alutacea</i>         | FLAS-F59409             | Pakistan        | MN495935        | MN493146        | —            | —           |
| <i>O. alutacea</i>         | LAH35220                | Pakistan        | MN495934        | MN493147        | —            | —           |
| <i>O. alutacea</i>         | GC 98092002             | France          | KM010073        | KM823462        | —            | —           |
| <i>O. alutacea</i>         | KH.09.133               | Norway          | KM010071        | KM823185        | KM823253     | KM823381    |
| <i>O. alutacea</i>         | ARAN A3023204           | Spain           | KM010072        | KM823186        | KM823254     | KM823382    |
| <i>O. alutacea</i>         | HKAS 82112              | China           | KY498600        | KY498605        | —            | —           |
| <i>O. alutacea</i>         | KS-94-111 (C)           | Denmark         | KM010074        | KM823463        | —            | —           |
| <i>O. alutacea</i>         | S-F257084               | Italy           | KM010075        | KM823464        | —            | —           |
| <i>O. alutacea</i>         | FLAS-F-62365            | USA             | MT373947        | MT350446        | —            | —           |
| <b><i>O. alutacea</i></b>  | <b>HMAS 83560</b>       | <b>China</b>    | <b>OM701796</b> | DQ443442        | —            | —           |
| <b><i>O. alutacea</i></b>  | <b>HMJAU 22992</b>      | <b>China</b>    | <b>OM703442</b> | <b>OM722132</b> | —            | —           |
| <b><i>O. alutacea</i></b>  | <b>HMAS 83559</b>       | <b>China</b>    | <b>OM704914</b> | DQ443441        | —            | —           |
| <i>O. alutacea</i>         | OSC 56777               | USA             | AF072071        | AF086582        | —            | —           |
| <i>O. alutacea</i>         | OSC 56798               | USA             | AF072072        | AF086583        | —            | —           |
| <i>O. alutacea</i>         | OSC 56747               | USA             | AF072070        | KM823189        | KM823257     | —           |
| <i>O. alutacea</i>         | OSC 56770               | USA             | AF072073        | AF086585        | —            | —           |
| <i>O. alutacea</i>         | KH.09.135               | Norway          | KM010064        | KM823190        | KM823258     | KM823384    |
| <i>O. alutacea</i>         | KH.10.198               | Sweden          | KM010065        | KM823459        | —            | —           |
| <i>O. alutacea</i>         | KH.13.50                | Sweden          | KM010076        | KM823465        | —            | —           |
| <i>O. alutacea</i>         | JS.08.43                | Sweden          | KM010063        | KM823458        | —            | —           |
| <i>O. alutacea</i>         | KH.09.178               | Sweden          | KM010066        | KM823191        | KM823259     | KM823385    |
| <i>O. alutacea</i>         | K(M)142010              | England         | KT818924        | —               | —            | —           |
| <i>O. alutacea</i>         | KS-94-192               | Denmark         | KM010067        | KM823460        | —            | —           |
| <i>O. alutacea</i>         | Moorefun19              | USA             | KM010070        | KM823194        | KM823262     | KM823387    |
| <i>O. alutacea</i>         | OSC 56782               | USA             | AF072076        | AF086586        | —            | —           |
| <i>O. alutacea</i>         | OSC 56813               | USA             | AF072075        | AF086584        | —            | —           |
| <i>O. alutacea</i>         | OSC 56758               | USA             | AF072074        | KM823193        | KM823261     | —           |
| <i>O. alutacea</i>         | KH.07.46                | Denmark         | KM010061        | KM823457        | —            | —           |
| <i>O. alutacea</i>         | KH.09.170               | Sweden          | KM010059        | KC012691        | KC109261     | JX943830    |
| <i>O. alutacea</i>         | KH.10.193               | Sweden          | KM010060        | KM823188        | KM823256     | —           |
| <i>O. alutacea</i>         | C-F-48045               | Sweden          | KM010068        | KM823461        | —            | —           |
| <i>O. alutacea</i>         | WZ 2123 (HMAS 72058)    | China           | KU987013        | KU987025        | —            | —           |
| <i>O. alutacea</i>         | WZ 2128 (HMAS 72057)    | China           | KU987014        | KU987026        | OM792147     | OM792167    |
| <i>O. angusta</i>          | H6010804                | Finland         | KF717574        | KM823195        | KM823263     | KM823388    |
| <i>O. apophysata</i>       | S-F257062               | Germany         | KM010077        | KM823196        | KM823264     | KM823389    |

|                             |                    |              |                 |                 |                 |                 |
|-----------------------------|--------------------|--------------|-----------------|-----------------|-----------------|-----------------|
| <i>O. apophysata</i>        | K(M)87117          | England      | EU784382        | —               | —               | —               |
| <b><i>O. aspera</i></b>     | <b>HMJAU 4166</b>  | <b>China</b> | <b>OM743958</b> | <b>OM743964</b> | <b>OM792154</b> | <b>OM792174</b> |
| <b><i>O. aspera</i></b>     | <b>HSA 278</b>     | <b>China</b> | <b>OM743960</b> | <b>OM743951</b> | <b>OM792153</b> | <b>OM792175</b> |
| <i>O. bicolor</i>           | HMAS 188415        | China        | KU987008        | KU987020        | —               | —               |
| <b><i>O. bicolor</i></b>    | <b>HKAS 54453</b>  | <b>China</b> | <b>OM714812</b> | <b>OM722133</b> | <b>OM792152</b> | <b>OM792173</b> |
| <i>O. borealis</i>          | S-F242694          | Finland      | KM010023        | KM823197        | KM823265        | KM823390        |
| <i>O. brevispora</i>        | HKAS 43003         | China        | —               | DQ443450        | —               | —               |
| <b><i>O. brevispora</i></b> | <b>HMAS 83551</b>  | <b>China</b> | <b>OM792189</b> | <b>OM722134</b> | <b>OM792148</b> | <b>OM792168</b> |
| <i>O. brunneoparva</i>      | KH.08.107          | Sweden       | KM010026        | KM823200        | KM823268        | KM823393        |
| <i>O. brunneoparva</i>      | JS.08.66           | Sweden       | KM010028        | KM823467        | —               | —               |
| <i>O. brunneoparva</i>      | KH.09.82           | Sweden       | KM010029        | KM823198        | KM823266        | KM823391        |
| <i>O. brunneoparva</i>      | S-F249386          | Finland      | KM010024        | KM823466        | —               | —               |
| <i>O. brunneoparva</i>      | S-F257086          | Finland      | KM010025        | KM823199        | KM823267        | KM823392        |
| <i>O. brunneoparva</i>      | TUR-A 198582       | Finland      | KM010027        | KM823468        | —               | —               |
| <i>O. bufonia</i>           | ZMU124             | China        | MW724241        | —               | —               | —               |
| <i>O. bufonia</i>           | JS150904-08        | Korea        | KX963782        | —               | —               | —               |
| <i>O. bufonia</i>           | JS.08.55           | Sweden       | KM010078        | KM823469        | —               | —               |
| <i>O. bufonia</i>           | TUR-A 208341       | Italy        | MK850496        | MK850509        | —               | —               |
| <i>O. bufonia</i>           | MCVE 29370         | Italy        | MG383802        | MG383810        | —               | —               |
| <i>O. bufonia</i>           | TUR-A 148640       | Italy        | MK850492        | MK850505        | —               | —               |
| <i>O. bufonia</i>           | MCVE 29367         | Italy        | MG383799        | MG383807        | —               | —               |
| <i>O. bufonia</i>           | KH.07.37           | Denmark      | JN942767        | JN941098        | KC109262        | JN993552        |
| <i>O. bufonia</i>           | KH.09.172          | Sweden       | JN942764        | JN941097        | KM823272        | KM823397        |
| <i>O. bufonia</i>           | MCVE 29369         | Italy        | MG383801        | MG383809        | —               | —               |
| <i>O. bufonia</i>           | MCVE 29368         | Italy        | MG383800        | MG383808        | —               | —               |
| <i>O. bufonia</i>           | TUR-A 208338       | Italy        | MK850493        | MK850506        | —               | —               |
| <i>O. bufonia</i>           | TUR-A 208342       | Italy        | MK850497        | MK850510        | —               | —               |
| <i>O. bufonia</i>           | TUR-A 208339       | Italy        | MK850494        | MK850507        | —               | —               |
| <i>O. bufonia</i>           | KH.09.248          | Spain        | JN942766        | JN941084        | KM823269        | KM823394        |
| <i>O. bufonia</i>           | KH.09.249          | France       | KM010079        | KM823201        | KM823271        | KM823396        |
| <i>O. bufonia</i>           | NV 2009.11.01      | France       | JN942765        | JN941085        | KM823270        | KM823395        |
| <b><i>O. bufonia</i></b>    | <b>HMAS 188416</b> | <b>China</b> | <b>OM716927</b> | <b>OM722136</b> | —               | —               |
| <b><i>O. bufonia</i></b>    | <b>HKAS 54451</b>  | <b>China</b> | <b>OM716929</b> | <b>OM722137</b> | —               | —               |
| <b><i>O. bufonia</i></b>    | <b>HMAS 76106</b>  | <b>China</b> | <b>OM716928</b> | <b>OM723194</b> | —               | —               |
| <i>O. bufonia</i>           | MCVE 29372         | Finland      | MG383803        | MG383812        | —               | —               |
| <i>O. bufonia</i>           | TUR-A 208340       | Italy        | MK850495        | MK850508        | —               | —               |
| <i>O. aff. bufonia</i>      | K(M)41595          | England      | MN627811        | —               | —               | —               |
| <i>O. aff. bufonia</i>      | K(M)156077         | England      | MN627813        | —               | —               | —               |
| <i>O. cf. bufonia</i>       | SE-2015            | USA          | KT275680        | —               | —               | —               |
| <i>O. cf. bufonia</i>       | GO-2009-365        | Mexico       | KC152161        | —               | —               | —               |
| <i>O. caeruleopruinosa</i>  | H6010805           | Finland      | KF717575        | KM823202        | KM823273        | KM823398        |
| <i>O. caeruleopruinosa</i>  | KH.13.48           | Sweden       | KM010081        | KM823470        | —               | —               |
| <i>O. caeruleopruinosa</i>  | MT 10082601        | Spain        | KM010030        | KM823203        | —               | KM823399        |
| <i>O. cantharella</i>       | JS.08.47           | Sweden       | KM010083        | KM823472        | —               | —               |
| <i>O. cantharella</i>       | JS.08.18           | Sweden       | KM010082        | KM823471        | —               | —               |
| <i>O. cantharella</i>       | KH.09.125          | Sweden       | KM010084        | KM823205        | KM823274        | KM823401        |
| <i>O. cantharella</i>       | NV 2008.09.16      | France       | KM010085        | KM823204        | —               | KM823400        |
| <i>O. concinna</i>          | JS.08.59           | Sweden       | KM010031        | KM823473        | —               | —               |
| <i>O. concinna</i>          | KH.09.250          | Spain        | JN942775        | JN941095        | KM823276        | KM823403        |

|                            |                    |              |                 |                 |                 |                 |
|----------------------------|--------------------|--------------|-----------------|-----------------|-----------------|-----------------|
| <i>O. concinna</i>         | KH.09.183          | Sweden       | KM010032        | JN941089        | KM823275        | KM823402        |
| <i>O. cupulata</i>         | <b>HSA 406</b>     | <b>China</b> | <b>OM743959</b> | <b>OM743970</b> | <b>OM792165</b> | <b>OM792177</b> |
| <i>O. cupulata</i>         | <b>HSA 218</b>     | <b>China</b> | <b>OM743973</b> | <b>OM743954</b> | <b>OM792166</b> | <b>OM792176</b> |
| <i>O. daliensis</i>        | SEST-06081702      | Spain        | KM010086        | KM823206        | KM823277        | KM823404        |
| <i>O. daliensis</i>        | AM-AR17-016        | Argentina    | MH930311        | —               | —               | —               |
| <i>O. daliensis</i>        | HMAS 57688         | China        | —               | DQ443445        | —               | —               |
| <i>O. felina</i>           | 9572               | Italy        | JF908509        | —               | —               | —               |
| <i>O. filiformis</i>       | <b>HMAS 188468</b> | <b>China</b> | <b>OM743949</b> | <b>OM743955</b> | <b>OM792155</b> | <b>OM792178</b> |
| <i>O. filiformis</i>       | <b>BJTC C505</b>   | <b>China</b> | <b>MW554241</b> | <b>OM743968</b> | <b>OM792156</b> | <b>OM792179</b> |
| <i>O. filiformis</i>       | <b>BJTC L482</b>   | <b>China</b> | <b>MW554466</b> | <b>OM743963</b> | <b>OM792157</b> | <b>OM792180</b> |
| <i>O. flavidobrunneola</i> | H6010806           | Finland      | KF717576        | KM823209        | KM823279        | KM823407        |
| <i>O. flavidobrunneola</i> | KH.09.153          | Norway       | KM010088        | KM823207        | —               | KM823405        |
| <i>O. flavidobrunneola</i> | H6010830           | Finland      | KM010087        | KM823208        | KM823278        | KM823406        |
| <i>O. formicarum</i>       | KH.11.104          | Sweden       | KM010033        | KM823475        | —               | —               |
| <i>O. formicarum</i>       | JS.08.63           | Sweden       | KM010035        | KM823212        | KM823282        | —               |
| <i>O. formicarum</i>       | H6003549           | Finland      | KF717577        | KM823211        | KM823281        | KM823409        |
| <i>O. formicarum</i>       | H6003550           | Finland      | KM010036        | KM823474        | —               | —               |
| <i>O. formicarum</i>       | S-F244372          | Norway       | KM010034        | KM823210        | KM823280        | KM823408        |
| <i>O. hanseniae</i>        | WZ 2202            | China        | KU987012        | KU987024        | KU987033        | —               |
| <i>O. hanseniae</i>        | XF007              | China        | KU987016        | KU987028        | KU987035        | KU987038        |
| <i>O. integra</i>          | S-F108342          | Italy        | KP006504        | —               | —               | —               |
| <i>O. kauffmanii</i>       | MICH 14409         | USA          | KF717579        | —               | —               | —               |
| <i>O. kaushalii</i>        | T. Læssøe 6236     | Malaysia     | KM010119        | AF335111        | KM823326        | KM823455        |
| <i>O. khakicolorata</i>    | <b>BJTC FM107</b>  | <b>China</b> | <b>OM743967</b> | <b>OM743950</b> | <b>OM792158</b> | <b>OM792181</b> |
| <i>O. korfii</i>           | Z.W. Ge 1913       | China        | KU987017        | KU987029        | KU987036        | —               |
| <i>O. kunmingensis</i>     | HKAS 49452         | China        | MK850489        | —               | —               | —               |
| <i>O. lactea</i>           | HMAS 61359         | China        | <b>OM721661</b> | DQ443447        | —               | —               |
| <i>O. leporina</i>         | JS.08.46           | Sweden       | KM010089        | KM823477        | —               | —               |
| <i>O. leporina</i>         | JS.08.92           | Sweden       | KM010091        | KM823478        | —               | —               |
| <i>O. leporina</i>         | NV 2008.09.28      | France       | KM010092        | KM823214        | KM823284        | KM823411        |
| <i>O. leporina</i>         | OSC 56824          | USA          | —               | KM823216        | KM823286        | KM823413        |
| <i>O. leporina</i>         | OSC 56784          | USA          | —               | KM823215        | KM823285        | KM823412        |
| <i>O. leporina</i>         | H6003548           | Finland      | KF717578        | KM823222        | KM823292        | KM823421        |
| <i>O. leporina</i>         | PA12               | Latvia       | KR019792        | —               | —               | —               |
| <i>O. leporina</i>         | KH.09.93           | Sweden       | KM010090        | KM823213        | KM823283        | KM823410        |
| <i>O. leporina</i>         | <b>HMAS 254161</b> | <b>China</b> | <b>OM731674</b> | <b>OM727116</b> | —               | —               |
| <i>O. leporina</i>         | <b>HMAS 83570</b>  | <b>China</b> | <b>OM721662</b> | DQ443443        | —               | —               |
| <i>O. leporina</i>         | <b>HMAS 29549</b>  | <b>China</b> | <b>OM721663</b> | <b>OM727117</b> | —               | —               |
| <i>O. microspora</i>       | AH30502            | USA          | AF072094        | —               | —               | —               |
| <i>O. minor</i>            | KH.98.84           | Denmark      | KM010041        | KM823217        | KM823287        | KM823414        |
| <i>O. minor</i>            | H6008618           | Finland      | KM010039        | KM823219        | KM823289        | KM823416        |
| <i>O. minor</i>            | KH.10.311          | Sweden       | KM010042        | KM823218        | KM823288        | KM823415        |
| <i>O. minor</i>            | H6003841           | Finland      | KM010040        | KM823479        | —               | —               |
| <i>O. minor</i>            | TL-Vorsø-0754      | Denmark      | KM010043        | KM823480        | —               | —               |
| <i>O. minor</i>            | C-F-83445          | Denmark      | KM010038        | KM823481        | —               | —               |
| <i>O. minor</i>            | CL 950914-01       | Italy        | KM010044        | KM823220        | —               | —               |
| <i>O. mirabilis</i>        | KH.09.188          | Sweden       | JN942770        | JN941086        | —               | KM823417        |
| <i>O. mirabilis</i>        | MCVE 29374         | Italy        | MG383805        | MG383813        | —               | —               |
| <i>O. mirabilis</i>        | GMFN 1951          | Italy        | KF717580        | KM823483        | —               | —               |

|                              |                    |              |                 |                 |          |          |
|------------------------------|--------------------|--------------|-----------------|-----------------|----------|----------|
| <i>O. mirabilis</i>          | KH.01.09           | Denmark      | JN942769        | AY500540        | KM823290 | KM823419 |
| <i>O. mirabilis</i>          | S-F257083          | Finland      | KM010095        | KM823482        | —        | —        |
| <i>O. mirabilis</i>          | NV 2008.09.14      | France       | JN942768        | JN941094        | KM823291 | KM823420 |
| <i>O. mirabilis</i>          | KH.10.285          | Sweden       | KM010094        | KM823221        | —        | KM823418 |
| <b><i>O. mirabilis</i></b>   | <b>HMAS 83568</b>  | <b>China</b> | <b>OM721670</b> | DQ443449        | —        | —        |
| <b><i>O. mirabilis</i></b>   | <b>HKAS 28129</b>  | <b>China</b> | <b>OM721671</b> | <b>OM728199</b> | —        | —        |
| <b><i>O. mirabilis</i></b>   | <b>HKAS 33633</b>  | <b>China</b> | <b>OM721672</b> | <b>OM728197</b> | —        | —        |
| <b><i>O. mirabilis</i></b>   | <b>HKAS 30708</b>  | <b>China</b> | <b>OM721673</b> | <b>OM728195</b> | —        | —        |
| <b><i>O. mirabilis</i></b>   | <b>BJTC FM292</b>  | <b>China</b> | <b>OM721674</b> | <b>OM728196</b> | —        | —        |
| <b><i>O. mirabilis</i></b>   | <b>HKAS 37272</b>  | <b>China</b> | <b>OM721676</b> | <b>OM728200</b> | —        | —        |
| <b><i>O. mirabilis</i></b>   | <b>HSA 234</b>     | <b>China</b> | <b>OM721675</b> | <b>OM728198</b> | —        | —        |
| <b><i>O. mirabilis</i></b>   | <b>HMJAU 26926</b> | <b>China</b> | <b>OM721677</b> | <b>OM728283</b> | —        | —        |
| <b><i>O. nannfeldtii</i></b> | <b>BJTC FM168</b>  | <b>China</b> | <b>OM721808</b> | <b>OM728519</b> | —        | —        |
| <b><i>O. nannfeldtii</i></b> | <b>BJTC FM169</b>  | <b>China</b> | <b>OM721807</b> | <b>OM728521</b> | —        | —        |
| <b><i>O. nannfeldtii</i></b> | <b>BJTC FM170</b>  | <b>China</b> | <b>OM721810</b> | <b>OM728520</b> | —        | —        |
| <b><i>O. nannfeldtii</i></b> | <b>BJTC FM236</b>  | <b>China</b> | <b>OM721811</b> | <b>OM728522</b> | —        | —        |
| <b><i>O. nannfeldtii</i></b> | <b>BJTC FM243</b>  | <b>China</b> | <b>OM721809</b> | <b>OM728523</b> | —        | —        |
| <i>O. nannfeldtii</i>        | CL091116-17        | Italy        | KM010096        | KM823484        | —        | —        |
| <i>O. nannfeldtii</i>        | S-F257096          | Italy        | KM010097        | KM823485        | —        | —        |
| <i>O. nannfeldtii</i>        | CL091207-01        | Italy        | KM010098        | KM823486        | —        | —        |
| <i>O. nannfeldtii</i>        | JS.08.103          | Sweden       | KM010045        | KM823224        | KM823294 | KM823423 |
| <i>O. nannfeldtii</i>        | S-F249387          | Finland      | KM010093        | KM823225        | —        | —        |
| <i>O. nannfeldtii</i>        | H6002902           | Finland      | KF717581        | KM823228        | KM823297 | KM823426 |
| <i>O. nannfeldtii</i>        | NV 2008.10.01      | France       | KM010099        | KM823227        | KM823296 | KM823425 |
| <i>O. nannfeldtii</i>        | rh101310           | USA          | KM010100        | KM823226        | KM823295 | KM823424 |
| <i>O. nannfeldtii</i>        | KH.10.302          | Sweden       | KM010101        | KM823223        | KM823293 | KM823422 |
| <b><i>O. nannfeldtii</i></b> | <b>HMAS 83573</b>  | <b>China</b> | <b>OM721812</b> | <b>OM728524</b> | —        | —        |
| <i>O. olivaceobrunnea</i>    | HMAS 23948         | China        | KU987010        | KU987022        | —        | —        |
| <i>O. onotica</i>            | OSC 56734          | USA          | AF072066        | AF086577        | —        | —        |
| <i>O. onotica</i>            | OSC 56759          | USA          | AF072068        | JN941088        | KM823300 | KM823430 |
| <i>O. onotica</i>            | OSC 56801          | USA          | AF072067        | AF086578        | —        | —        |
| <i>O. onotica</i>            | C-F-89691          | Denmark      | JN942773        | JN941090        | —        | KM823427 |
| <i>O. onotica</i>            | JS.08.48           | Sweden       | KM010102        | KM823487        | —        | —        |
| <i>O. onotica</i>            | MCVE 23277         | Italy        | KM010104        | KM823488        | —        | —        |
| <i>O. onotica</i>            | KH.10.284          | Sweden       | KP006505        | KM823229        | KM823299 | KM823429 |
| <i>O. onotica</i>            | KH.09.132          | Norway       | KM010103        | KC012692        | KC109263 | JX943828 |
| <i>O. onotica</i>            | KH.09.136          | Norway       | JN942772        | JN941096        | KM823298 | KM823428 |
| <i>O. onotica</i>            | DMS-9327924        | Denmark      | MT644895        | MT644895        | —        | —        |
| <b><i>O. onotica</i></b>     | <b>HMAS 280314</b> | <b>China</b> | <b>OM721813</b> | <b>OM728528</b> | —        | —        |
| <b><i>O. onotica</i></b>     | <b>HMAS 33473</b>  | <b>China</b> | <b>OM721814</b> | <b>OM728529</b> | —        | —        |
| <b><i>O. onotica</i></b>     | <b>HMAS 97555</b>  | <b>China</b> | <b>OM721817</b> | <b>OM728532</b> | —        | —        |
| <i>O. oregonensis</i>        | OSC 56745          | USA          | AF072089        | KM823232        | KM823303 | KM823433 |
| <i>O. oregonensis</i>        | NSW 6354           | USA          | AF072088        | AF086598        | —        | —        |
| <i>O. oregonensis</i>        | OSC 56829          | USA          | AF072087        | AF086597        | —        | —        |
| <i>O. oregonensis</i>        | Moorefun 58        | USA          | KM010048        | KM823231        | KM823302 | KM823432 |
| <i>O. oregonensis</i>        | rh139              | USA          | KM010046        | KM823489        | —        | —        |
| <i>O. oregonensis</i>        | Moorefun 31        | USA          | KM010047        | KM823230        | KM823301 | KM823431 |
| <i>O. papillata</i>          | TUR 102134         | Finland      | KM010105        | KM823233        | KM823304 | KM823434 |
| <i>O. papillata</i>          | H6003547           | Finland      | KF717582        | KM823234        | KM823305 | KM823435 |

|                                  |                           |              |                 |                 |                 |                 |
|----------------------------------|---------------------------|--------------|-----------------|-----------------|-----------------|-----------------|
| <i>O. papillata</i>              | 741                       | USA          | KX389120        | —               | —               | —               |
| <i>O. papillata</i> f.           | NV 2007.09.27             | France       | KF717584        | KM823235        | —               | —               |
| <i>pallidefurfuracea</i>         |                           |              |                 |                 |                 |                 |
| <i>O. parvispora</i>             | K(M)70199                 | England      | EU784380        | —               | —               | —               |
| <i>O. parvispora</i>             | JS.08.81                  | Sweden       | KM010062        | KM823187        | KM823255        | KM823383        |
| <i>O. parvispora</i>             | MCVE 30108                | Spain        | MK850491        | MK850504        | —               | —               |
| <i>O. parvispora</i>             | MCVE 30107                | Greece       | MK850490        | MK850503        | —               | —               |
| <b><i>O. parvula</i></b>         | <b>BJTC FM210-A</b>       | <b>China</b> | <b>OM743965</b> | <b>OM743966</b> | <b>OM792159</b> | <b>OM792182</b> |
| <b><i>O. parvula</i></b>         | <b>BJTC FM210-B</b>       | <b>China</b> | <b>OM743962</b> | <b>OM743956</b> | <b>OM792160</b> | <b>OM792183</b> |
| <i>O. phlebophora</i>            | JV06-385                  | Denmark      | KM010049        | KM823236        | KM823306        | KM823436        |
| <i>O. phlebophora</i>            | S-F108338                 | Sweden       | KM010050        | KM823490        | —               | —               |
| <i>O. phlebophora</i>            | K(M)143475                | England      | MN627790        | —               | —               | —               |
| <i>O. platyspora</i>             | KH.09.163                 | Sweden       | KM010106        | KM823238        | KM823308        | KM823438        |
| <i>O. platyspora</i>             | HK0846                    | Sweden       | KM010107        | KM823491        | —               | —               |
| <i>O. platyspora</i>             | JV06-656                  | Denmark      | KM010108        | KM823237        | KM823307        | KM823437        |
| <b><i>O. plicara</i></b>         | <b>BJTC FM262-A</b>       | <b>China</b> | <b>OM743957</b> | <b>OM743971</b> | <b>OM792161</b> | <b>OM792187</b> |
| <b><i>O. plicara</i></b>         | <b>BJTC FM262-B</b>       | <b>China</b> | <b>OM743961</b> | <b>OM743952</b> | <b>OM792162</b> | <b>OM792186</b> |
| <b><i>O. propinquata</i></b>     | <b>BJTC FM171</b>         | <b>China</b> | <b>OM731678</b> | <b>OM728537</b> | —               | —               |
| <b><i>O. propinquata</i></b>     | <b>BJTC FM49</b>          | <b>China</b> | <b>OM731677</b> | <b>OM728536</b> | —               | —               |
| <b><i>O. propinquata</i></b>     | <b>BJTC FM233</b>         | <b>China</b> | <b>OM731673</b> | <b>OM728545</b> | —               | —               |
| <i>O. propinquata</i>            | JS.08.67                  | Sweden       | KM010110        | KM823492        | —               | —               |
| <i>O. propinquata</i>            | NV 2008.09.15             | France       | KM010111        | KM823240        | KM823310        | KM823440        |
| <i>O. propinquata</i>            | HMAS 83564                | China        | KU987009        | KU987021        | —               | —               |
| <i>O. propinquata</i>            | KH.09.99                  | Sweden       | KM010109        | KM823239        | KM823309        | KM823439        |
| <b><i>O. propinquata</i></b>     | <b>HMAS 83575</b>         | <b>China</b> | <b>OM731675</b> | <b>OM728547</b> | —               | —               |
| <b><i>O. propinquata</i></b>     | <b>HMAS 83576</b>         | <b>China</b> | <b>OM731676</b> | <b>OM728546</b> | —               | —               |
| <i>O. pruinosa</i>               | MFLU:16-0611              | China        | KY498604        | KY498609        | —               | —               |
| <i>O. pruinosa</i>               | HKAS 81819                | China        | KY498602        | KY498607        | <b>OM792149</b> | <b>OM792169</b> |
| <i>O. pseudoformicarum</i>       | HKAS 101386               | China        | KY498601        | KY498606        | —               | MG980709        |
| <i>O. pseudoleporina</i>         | Moorefun14                | USA          | KM010113        | KM823242        | KM823312        | KM823442        |
| <i>O. pseudoleporina</i>         | rh101910                  | USA          | KM010112        | KM823243        | KM823313        | KM823443        |
| <i>O. pseudoleporina</i>         | NSW7574                   | USA          | AF072083        | AF086593        | —               | —               |
| <i>O. pseudoleporina</i>         | OSC 56749                 | USA          | AF072082        | AF086592        | —               | —               |
| <i>O. pseudoleporina</i>         | OSC 56809                 | USA          | AF072080        | KM823241        | KM823311        | KM823441        |
| <i>O. pseudoleporina</i>         | OSC 56760                 | USA          | AF072081        | KM823244        | KM823314        | KM823444        |
| <b><i>O. purpureobrunnea</i></b> | <b>BJTC FM1061</b>        | <b>China</b> | <b>OM743969</b> | <b>OM743972</b> | <b>OM792163</b> | <b>OM792185</b> |
| <b><i>O. purpureobrunnea</i></b> | <b>BJTC FM1048</b>        | <b>China</b> | <b>OM743974</b> | <b>OM743953</b> | <b>OM792164</b> | <b>OM792184</b> |
| <i>O. purpurea</i>               | HKAS 5670                 | China        | —               | MG742413        | —               | —               |
| <i>O. purpureogrisea</i>         | Z.W. Ge 863 (HKAS 449358) | China        | KU987011        | KU987023        | KU987032        | KU987037        |
| <i>O. purpureogrisea</i>         | WZ 2157 (HMAS72805)       | China        | KU987015        | KU987027        | KU987034        | <b>OM792170</b> |
| <i>O. rainierensis</i>           | A.H. Smith 30553 (MICH)   | USA          | KF717583        | KM823245        | KM823315        | KM823445        |
| <i>O. saliceticola</i>           | MCVE 29365                | Italy        | MG383806        | MG383814        | —               | —               |
| <i>O. sinensis</i>               | HMAS 61360                | China        | <b>OM722037</b> | DQ443451        | —               | —               |
| <i>O. smithii</i>                | OSC 56811                 | USA          | AF072060        | AF086572        | —               | —               |
| <i>O. smithii</i>                | OSC 56799                 | USA          | AF072063        | JN941087        | KM823317        | KM823447        |
| <i>O. smithii</i>                | OSC 56753                 | USA          | AF072062        | AF086574        | —               | —               |
| <i>O. smithii</i>                | OSC 56823                 | USA          | EU669213        | EU669265        | —               | —               |
| <i>O. smithii</i>                | ecv3345                   | USA          | JN942771        | JN941093        | KM823316        | KM823446        |

|                              |                   |              |                 |                 |                 |                 |
|------------------------------|-------------------|--------------|-----------------|-----------------|-----------------|-----------------|
| <i>O. stipitata</i>          | HKAS 87865        | China        | KY498603        | KY498608        | —               | —               |
| <i>O. subformicarum</i>      | CMP 1179          | Spain        | KM010053        | KM823246        | KM823318        | KM823448        |
| <i>O. subformicarum</i>      | CL050928-30       | Italy        | KM010052        | KM823247        | KM823319        | KM823449        |
| <i>O. subformicarum</i>      | S-F256979         | Spain        | KM010051        | KM823494        | —               | —               |
| <i>O. subformicarum</i>      | S-F242696         | Spain        | KM010054        | KM823495        | —               | —               |
| <i>O. aff. subformicarum</i> | FH301035          | Mexico       | KM010055        | KM823249        | KM823321        | KM823451        |
| <i>O. aff. subformicarum</i> | FH301036          | Mexico       | KM010056        | KM823248        | KM823320        | KM823450        |
| <i>O. subpurpurea</i>        | HKAS 54449        | China        | KU987018        | KU987030        | <b>OM792150</b> | <b>OM792171</b> |
| <i>O. subpurpurea</i>        | HMAS 97530        | China        | KU987019        | KU987031        | —               | —               |
| <b><i>O. subpurpurea</i></b> | <b>HKAS 54944</b> | <b>China</b> | <b>OM722058</b> | <b>OM728605</b> | <b>OM792151</b> | <b>OM792172</b> |
| <i>O. subterranea</i>        | RH69              | USA          | FJ404767        | FJ404767        | —               | —               |
| <i>O. subterranea</i>        | RH97              | USA          | FJ404766        | FJ404766        | —               | —               |
| <i>O. tuomikoskii</i>        | JS.08.100         | Sweden       | KM010116        | KM823498        | —               | —               |
| <i>O. tuomikoskii</i>        | NV 2008.09.08     | France       | JN942777        | JN941091        | KM823323        | KM823453        |
| <i>O. tuomikoskii</i>        | KH.11.77          | Sweden       | KM010117        | KM823499        | —               | —               |
| <i>O. tuomikoskii</i>        | KH.09.130         | Norway       | JN942776        | JN941092        | KM823322        | KM823452        |
| <i>O. tuomikoskii</i>        | OSC 56826         | USA          | AF072086        | AF086596        | —               | —               |
| <i>O. tuomikoskii</i>        | OSC 56756         | USA          | AF072084        | AF086594        | —               | —               |
| <i>O. tuomikoskii</i>        | OSC 56761         | USA          | AF072085        | KM823251        | KM823325        | KM823454        |
| <i>O. tuomikoskii</i>        | H6002901          | Finland      | KF717585        | KM823250        | KM823324        | —               |
| <i>O. tuomikoskii</i>        | MK200065          | Sweden       | KM010115        | KM823497        | —               | —               |
| <i>O. tuomikoskii</i>        | JS.08.68          | Sweden       | KM010114        | KM823496        | —               | —               |
| <i>O. tuomikoskii</i>        | PA13              | Latvia       | KR019793        | —               | —               | —               |
| <i>O. unicisa</i>            | FH RH1666         | USA          | MT373948        | MT373948        | —               | —               |
| <i>O. unicisa</i>            | ZW Geo65-Clark    | USA          | KM010118        | AY789369        | —               | —               |
| <i>O. unicisa</i>            | TENN 066839       | USA          | MG677140        | —               | —               | —               |
| <i>O. unicisa</i>            | KH.06.06          | USA          | —               | KC012693        | KC109264        | JX943829        |
| <i>O. yunnanensis</i>        | HMAS 82166        | China        | —               | DQ443452        | —               | —               |
| <i>O. sp.</i>                | LM4111            | Germany      | KM576487        | —               | —               | —               |
| <i>O. sp.</i>                | 216-318           | USA          | MH038148        | —               | —               | —               |
| <i>O. sp.</i>                | M540              | China        | MW551141        | MW520022        | —               | —               |
| <i>O. sp.</i>                | LM16              | Spain        | KM576486        | —               | —               | —               |
| <i>O. sp.</i>                | GMFN 2293         | Italy        | KM010037        | KM823476        | —               | —               |
| <i>O. sp.</i>                | LM3580            | Germany      | KM576485        | —               | —               | —               |
| <i>O. sp.</i>                | B250              | Estonia      | FN669231        | —               | —               | —               |
| <i>O. sp.</i>                | Plot3_33_M1       | Slovenia     | MW028106        | —               | —               | —               |
| <i>O. sp.</i>                | MK1081            | Sweden       | KM010058        | KM823501        | —               | —               |
| <i>O. sp.</i>                | MK0942            | Sweden       | KM010057        | KM823500        | —               | —               |
| <i>O. sp.</i>                | KH.09.79          | Sweden       | KM010120        | KM823252        | KM823327        | KM823456        |
| <i>O. sp.</i>                | TENN 070359       | USA          | KY777379        | —               | —               | —               |
| <i>O. sp.</i>                | FLAS-F-64209      | USA          | MT373946        | MT350445        | —               | —               |
| <i>O. sp.</i>                | RH1218            | USA          | MN653026        | —               | —               | —               |
| <i>O. sp.</i>                | FLAS-F-60735      | USA          | MH571410        | —               | —               | —               |
| Uncultured fungus            | RM D12            | Switzerland  | KX886079        | —               | —               | —               |
| Uncultured fungus            | F104              | Poland       | MH834496        | —               | —               | —               |
| Uncultured fungus            | II                | Poland       | MG835426        | —               | —               | —               |
| <i>Warcupia terrestris</i>   | CBS 891.69        | Canada       | MH859473        | MH871254        | KC109308        | JX943832        |
